# Supplementary material for: A photolithographic stretchable transparent electrode for an all-solution-processed fully transparent conformal organic transistor array
Source: Royal Society of Chemistry journal article supplement (doi:10.1039/c9tc01182j), 2019-01-01
Supplement: c9tc01182j1.pdf [file c9tc01182j1.pdf]

**Journal of**

**Materials Chemistry C**

COMMUNICATION

Supplementary information

**Photolithographic stretchable transparent electrode for all-solution-processed fully transparent conformal organic transistor array†**

Nan Cui,<sup>a</sup> Qingxin Tang,<sup>\*a</sup> Hang Ren,<sup>a</sup> Xiaoli Zhao,<sup>a</sup> Yanhong Tong<sup>a</sup> and Yichun Liu<sup>\*a</sup>

Dr. N. Cui, Prof. Q. Tang, H. Ren, Dr. X. Zhao, Prof. Y. Tong, and Prof. Y. Liu

Centre for Advanced Optoelectronic Functional Materials Research and Key Laboratory of UV-Emitting Materials and Technology (Northeast Normal University), Ministry of Education, Changchun 130024, P. R. China.

E-mail: tangqx@nenu.edu.cn; ycliu@nenu.edu.cn

**S1. Morphology of SWCNT network on PEDOT:PSS thin film.**

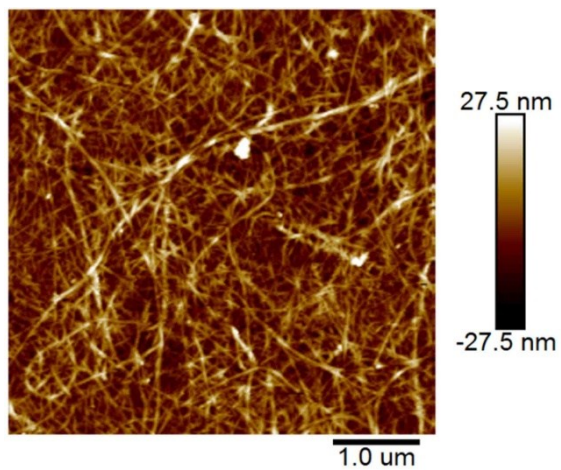

**Fig. S1** AFM image of dense SWCNT network on PEDOT:PSS thin film.

**S2. Fabrication process of photolithographic stretchable transparent PEDOT:PSS/SWCNT hybrid electrode.**

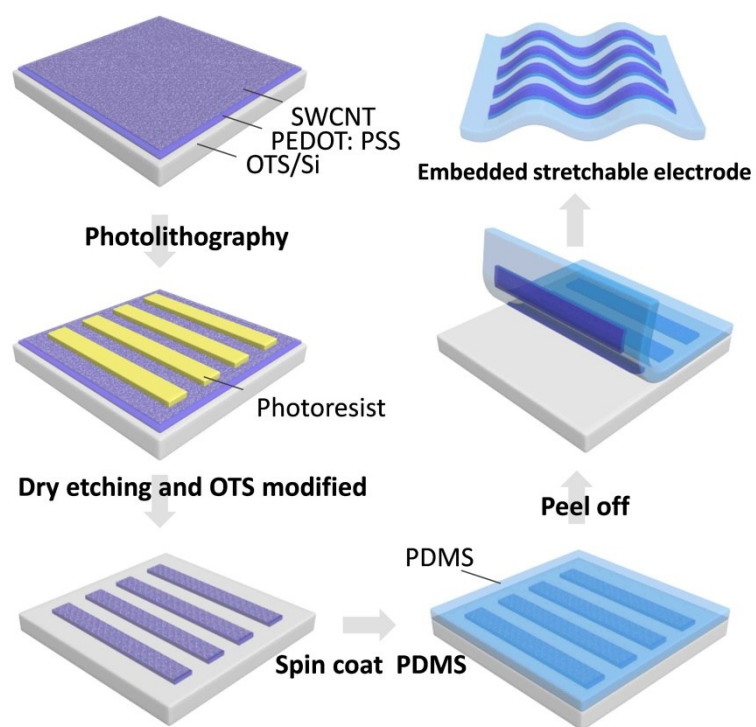

**Fig. S2** Schematic illustration for the fabrication process of photolithographic stretchable transparent PEDOT:PSS/SWCNT hybrid electrode.

### S3. Morphology of photolithographic PEDOT:PSS/SWCNT patterns.

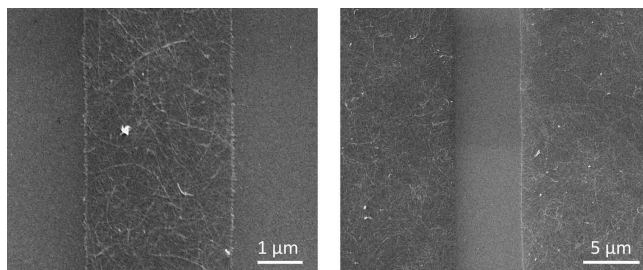

**Fig. S3** SEM images of PEDOT:PSS/SWCNT patterns.

#### S4. Deformability of the PEDOT:PSS/SWCNT electrode.

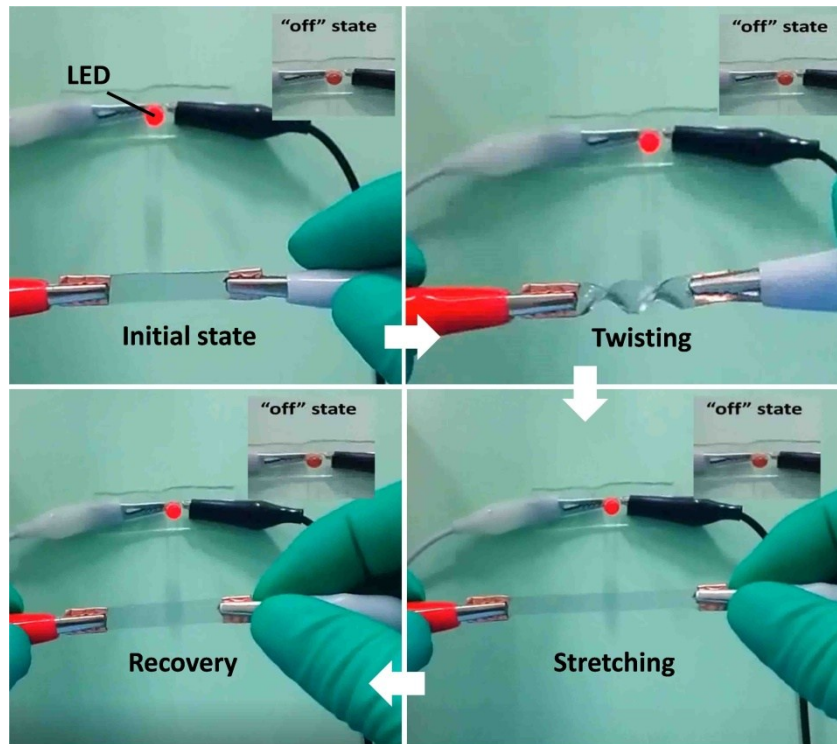

## S5. OTFT devices fabricated by conventional method.

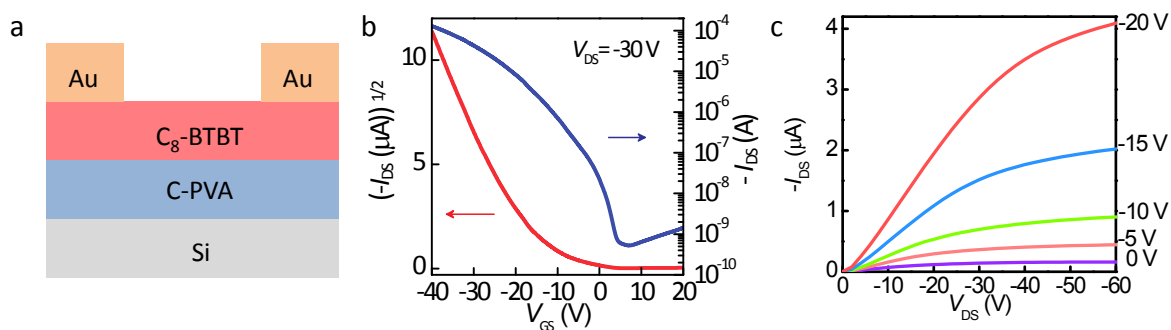

**Fig. S5** (a) Schematic image of C<sub>8</sub>-BTBT OTFT fabricated on silicon substrate (gate) with thermally evaporated Au source/drain electrode through a shadow mask. (b,c) Typical transfer and output characteristics of the device measured in air at room temperature. ( $\mu = 1.7\text{ cm}^2\text{ V}^{-1}\text{ s}^{-1}$ )

## S6. Performances of reported flexible OTFTs and our transparent conformal OTFTs with PEDOT:PSS/SWCNT electrode.

Table S6. Performances of reported flexible OTFTs and our transparent conformal OTFTs.

| Semiconductor            | Electrode                             | Dielectric                     | $\mu$ (cm <sup>2</sup> V <sup>-1</sup> s <sup>-1</sup> ) | V <sub>T</sub> (V) | I <sub>on</sub> /I <sub>off</sub> | Ref.     |
|--------------------------|---------------------------------------|--------------------------------|----------------------------------------------------------|--------------------|-----------------------------------|----------|
| DPh-DNTT pentacene       | Au (source/drain); Al (gate)          | AlO <sub>x</sub> /SAM          | 2.0                                                      | 2 V                | >10 <sup>5</sup>                  | [1]      |
| DNTT PTAA                | Au (source/drain); Ag (gate)          | parylene-C                     | 0.37                                                     | -21.3              | 4.9 × 10 <sup>5</sup>             | [2]      |
|                          |                                       |                                | 0.36                                                     | -15.7              | 1.6 × 10 <sup>5</sup>             |          |
| TIPS pentacene           | PEDOT:PSS (source/drain); Ag (gate)   | PVP                            | 0.013                                                    | -13.0              | 6.9 × 10 <sup>4</sup>             | [3]      |
| P3HT                     | Au (source/drain); PEDOT:PSS (gate)   | polyelectrolyte                | 0.95 ± 0.12                                              | -0.19 ± 0.03       | 2.5 × 10 <sup>3</sup>             | [4]      |
| BTBT-C <sub>12</sub> -PA | Au (source/drain); Al (gate)          | AlO <sub>x</sub>               | 2.0                                                      | 0.5-1.0            | 10 <sup>5</sup>                   | [5]      |
| TIPS pentacene           |                                       | Mylar                          | 1.7 × 10 <sup>-3</sup>                                   | -                  | 10 <sup>2</sup>                   | [6]      |
| TES-ADT                  | Ag (source/drain/gate)                | membrane                       | 0.15                                                     | -                  | 10 <sup>3</sup> - 10 <sup>4</sup> |          |
| PDPP5T                   | Au (source/drain); Cr/Au (gate)       | Al <sub>2</sub> O <sub>3</sub> | 0.4                                                      | -                  | 10 <sup>3</sup> - 10 <sup>4</sup> | [7]      |
| PIDT-BT                  |                                       |                                | 0.62                                                     | -                  | 2.47 × 10 <sup>6</sup>            | [8]      |
| P3HT                     | Au (source/drain/gate)                | PEG                            | 0.56                                                     | -0.35              | >10 <sup>4</sup>                  |          |
| N2200                    |                                       |                                | 1.28                                                     | 0.11               | >10 <sup>3</sup>                  | [9]      |
| pBTTT                    | Au (source/drain/gate)                | PMMA                           | 0.1                                                      | -                  | 10 <sup>2</sup>                   | [10]     |
| C8-BTBT                  | Au (source/drain); Au grid (gate)     | C-PVA                          | 0.3                                                      | -                  | 10 <sup>5</sup>                   |          |
| pentacene                |                                       |                                | 2.0                                                      | -15                | 10 <sup>5</sup> - 10 <sup>6</sup> | [11]     |
| PDI-C8                   | Au (source/drain/gate)                | PAN/PS                         | 0.52                                                     | -8.6               | -                                 |          |
| PTDPPSe-SiC4             | Graphene/Au (source/drain); Au (gate) | SU-8                           | 0.23                                                     | 8.5                | -                                 | [12]     |
|                          |                                       |                                | 1.43                                                     | -                  | >10 <sup>5</sup>                  |          |
| C8-BTBT                  | PEDOT:PSS/SWCNT (source/drain/gate)   | C-PVA                          | 0.37                                                     | -                  | >10 <sup>2</sup>                  | Our work |
|                          |                                       |                                | 2.7                                                      | ±10                | >10 <sup>4</sup>                  |          |

[1] T. Yokota, K. Kuribara, T. Tokuhara, U. Zschieschang, H. Klauk, K. Takimiya, Y. Sadamitsu, M. Hamada, T. Sekitani and T. Someya, *Adv. Mater.*, 2013, **25**, 3639.

[2] H. Jeong, S. Baek, S. Han, H. Jang, S. H. Kim and H. S. Lee, *Adv. Funct. Mater.*, 2018, **28**, 1704433.

[3] S. Conti, S. Lai, P. Cosseddu and A. Bonfiglio, *Adv. Mater. Technol.*, 2016, 1600212.

[4] S. W. Lee, H. J. Lee, J. H. Choi, W. G. Koh, J. M. Myoung, J. H. Hur, J. J. Park, J. H. Cho and U. Jeong, *Nano Lett.*, 2010, **10**, 347.

[5] T. Schmaltz, A. Y. Amin, A. Khassanov, T. Meyer-Friedrichsen, H.-G. Steinrück, A. Magerl, J. J. Segura, K. Voitkovsky, F. Stellacci and M. Halik, *Adv. Mater.*, 2013, **25**, 4511.

[6] H. T. Yi, M. M. Payne, J. E. Anthony and V. Podzorov, *Nat. Commun.*, 2012, **3**, 1259.

[7] Y. Ding, C. Zhu, J. Liu, Y. Duan, Z. Yi, J. Xiao, S. Wang, Y. Huang and Z. g Yin, *Nanoscale*, 2017, **9**, 19050.

[8] Z. Liu, Z. Yin, J. Wang and Q. Zheng, *Adv. Funct. Mater.*, 2018, 1806092.

[9] Y. Hu, C. Warwick, A. Sou, L. Jiang and H. Sirringhaus, *J. Mater. Chem. C*, 2014, **2**, 1260.

[10] N. Cui, H. Ren, Q. Tang, X. Zhao, Y. Tong, W. Hu and Y. Liu, *Nanoscale*, 2018, **10**, 3613.

[11] L. Zhang, H. Wang, Y. Zhao, Y. Guo, W. Hu, G. Yu and Y. Liu, *Adv. Mater.*, 2013, **25**, 5455.

[12] E. K. Lee, C. H. Park, J. Lee, H. R. Lee, C. Yang and J. H. Oh, *Adv. Mater.*, 2017, **29**, 1605282.
